# Supplementary material
Source: PubMed Central journal article supplement (PMC4720962)
Supplement: NIHMS542054-supplement-01.pdf [file NIHMS542054-supplement-01.pdf]

Figure S1. Syrovatkina et al.

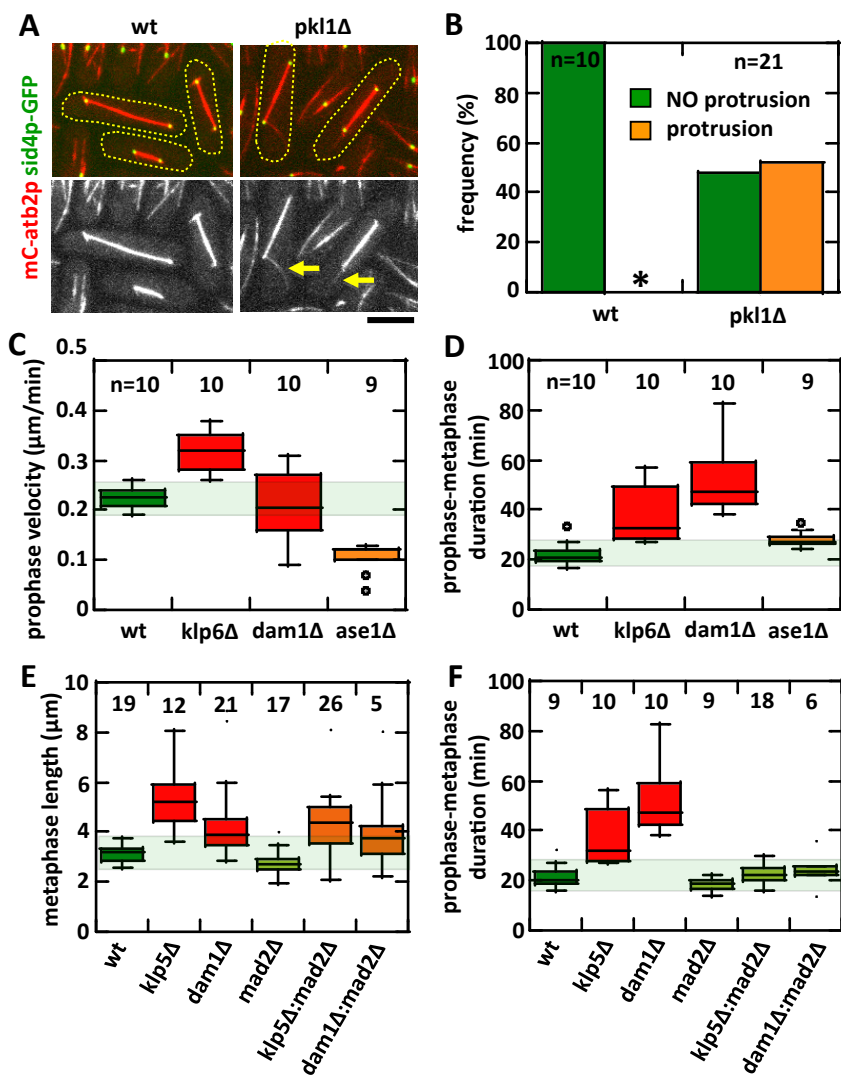

Figure S2. Syrovatkina et al.

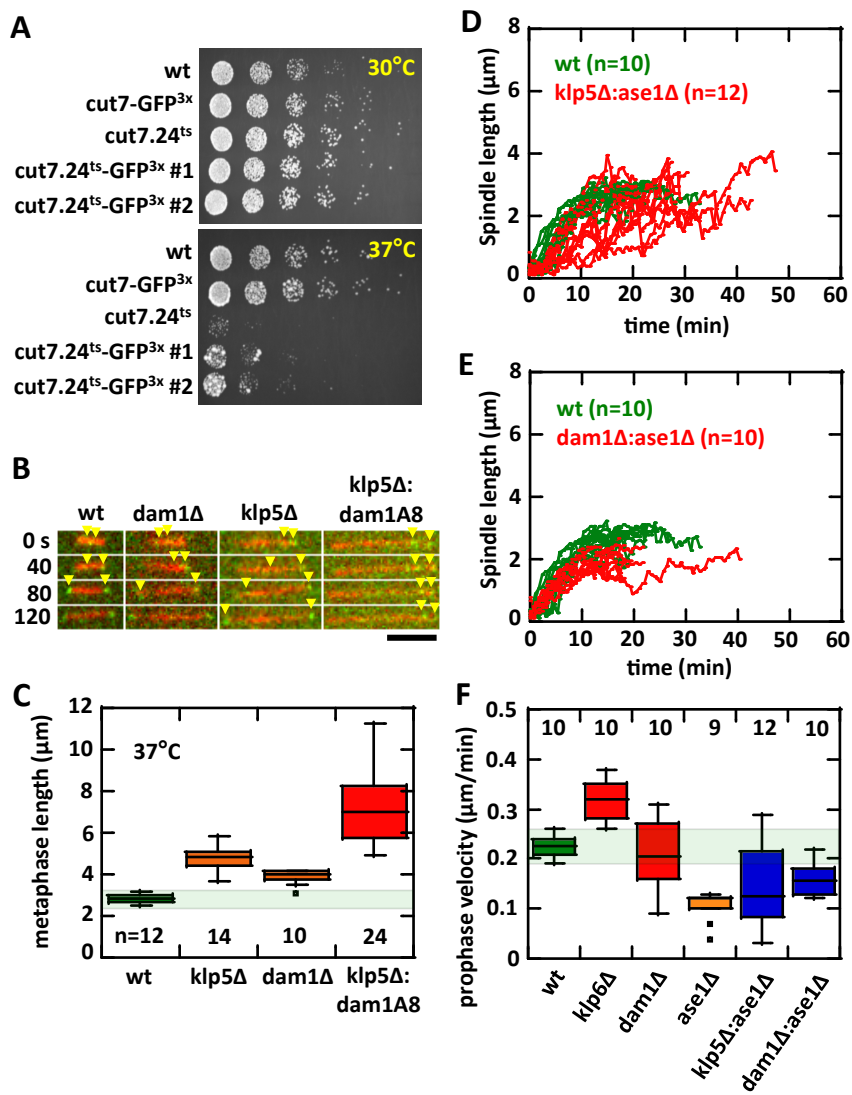

Figure S3. Syrovatkina et al.

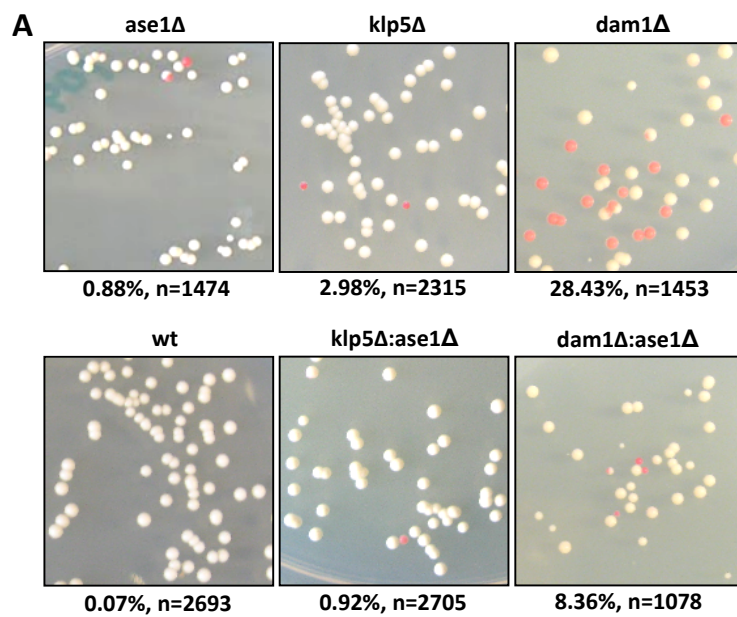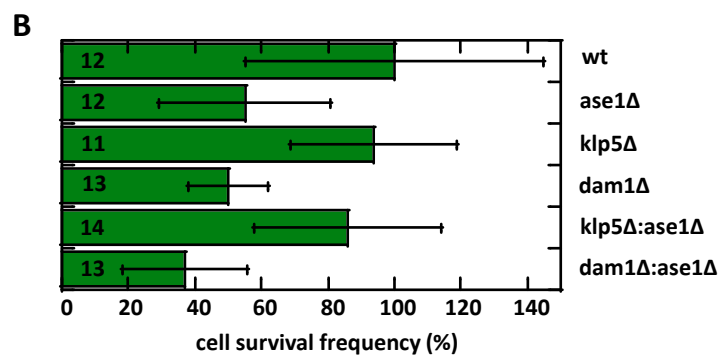

Figure S4. Syrovatkina et al.

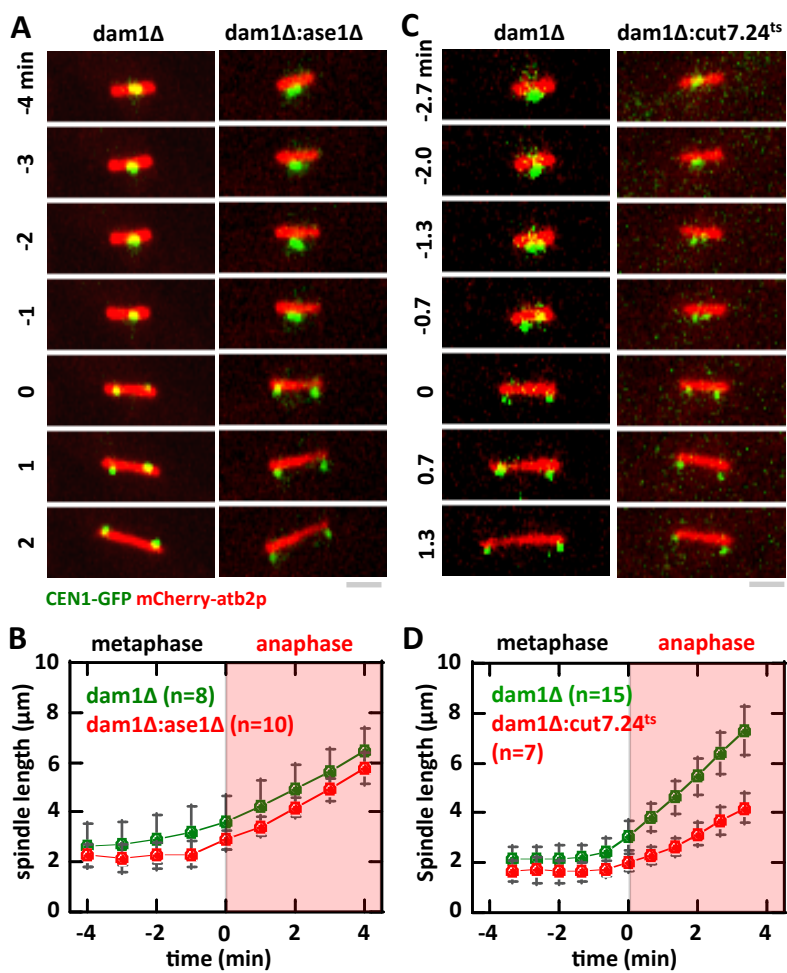

## Figure Legends

### Figure S1.

**(A)** Images of mitotic wildtype and *pk11Δ* cells expressing mCherry-atb2p (tubulin) and sid4p-GFP (SPB marker). Wildtype mitotic cells show different spindles at different stages/lengths. Astral MTs are relatively short. In contrast, *pk11Δ* cells have long astral MTs which protrude (yellow arrow) from the SPBs. Bar, 5  $\mu\text{m}$ .

**(B)** Comparative plot of astral MT protrusion in wildtype and *pk11Δ* cells. Whereas wildtype cells show no astral MT protrusion, ~50% of *pk11Δ* cells have astral MT protrusion, indicating spindle mal-formation [S1].

**(C)** Box plot of prophase velocities. Individual deletion *klp6Δ* and *ase1Δ* show different durations than wildtype. *dam1Δ* is similar to wildtype.

**(D)** Box plot of prophase-metaphase durations. Individual deletion *klp6Δ*, *dam1Δ*, and *ase1Δ* all show different durations than wildtype.

**(E)** Box plot of metaphase spindle lengths in response to the absence of the spindle assembly checkpoint proteins *mad2p*. Individual deletion *mad2Δ* resulted in similar metaphase spindle length compared to wildtype. In contrast, double-deletion *klp5Δ:mad2Δ* and *dam1Δ:mad2Δ* resulted in longer metaphase spindle lengths similar to *klp5Δ* and *dam1Δ*, respectively.

**(F)** Box plot shows prophase-metaphase duration in response to the absence of the spindle assembly checkpoint proteins *mad2p*. Individual mutants have prolonged prophase-metaphase durations compared to wildtype. In contrast, the double-mutants *klp5Δ:mad2Δ* and *dam1Δ:mad2Δ* have similar prophase-metaphase duration as wildtype.

### Figure S2.

**(A)** Spot assay for temperature sensitivity of fission yeast strains: wildtype, *cut7-GFP<sup>3x</sup>*, *cut7.24<sup>ts</sup>*, *cut7.24<sup>ts</sup>-GFP<sup>3x</sup>* (1), and *cut7.24<sup>ts</sup>-GFP<sup>3x</sup>* (2). At permissive temperature 30°C, all strains survive well. In contrast, at the non-permissive temperature 37°C, *cut7.24<sup>ts</sup>* is lethal [S2, S3]. However, when *cut7.24<sup>ts</sup>* is tagged with GFP, the new strains survive slightly better than *cut7.24<sup>ts</sup>* alone, suggesting that temperature-sensitivity is tenuous.

**(B)** Time-lapse images of wildtype, *dam1Δ*, *klp5Δ* and *dam1-A8:klp5Δ* mitotic cells expressing mCherry-atb2p (tubulin) and mis12p-GFP (kinetochore marker) at 37°C. Time 0 represents the transition from metaphase to anaphase A and anaphase B, where sister kinetochores (yellow arrow heads) are observed to separate to opposite poles, and the spindle elongates further. Note that the *dam1-A8:klp5Δ* failed to separate their kinetochores. Bar, 5  $\mu\text{m}$ .

- (C)** Box plot of metaphase spindle lengths wildtype, *dam1Δ*, *klp5Δ* and *dam1-A8:klp5Δ*. Consistent with the force-balance or tug-of-war model, removal of individual *dam1p* or *klp5p*, which are passive and active inward force transducer, respectively, result in longer metaphase spindle lengths compared to wildtype. Further, inactivation of both *dam1p* and *klp5p* results in even longer metaphase spindle lengths compared to individual deletion.
- (D)** Comparative plot of spindle length versus time of wildtype (green) and *klp5Δ:ase1Δ* (red) cells. Similar to wildtype, *klp5Δ:ase1Δ* metaphase spindles plateau at ~3 μm length. However, the spindle elongation is unstable, varying from cell to cell.
- (E)** Comparative plot of spindle length versus time of wildtype (green) and *dam1Δ:ase1Δ* (red) cells. Similar to wildtype, *dam1Δ:ase1Δ* metaphase spindles plateau at ~3 μm length.
- (F)** Box plot of spindle prophase elongation velocities. Individual deletion *klp6Δ*, *dam1Δ*, and *ase1Δ*, as well as double-deletion *klp5Δ:ase1Δ* and *dam1Δ:ase1Δ* all show different velocities than wildtype.

### Figure S3.

In an artificial mini-chromosome loss assay [S4], where cells which lose the artificial chromosome turn pink, we observed apparent rescue of chromosome segregation defects in double-deleted cells. Whereas wildtype has 0.07% of pink colonies, mutant *ase1Δ* has 0.88%, *klp5Δ* has 2.98%, and *dam1Δ* has 28.43% pink colonies (Fig. S3A), consistent with previous studies [S5-S7]. In contrast, *klp5Δ:ase1Δ* has 0.92% and *dam1Δ:ase1Δ* has 8.36% pink colonies, an apparent improvement in chromosome segregation (Fig. S3A). However, further analysis revealed that the mini-chromosome loss assay biases the results toward living cells, as dead cells cannot form colonies. Indeed, cell survival analysis revealed that wildtype and *klp5Δ* have similar ~100% survival rates, and mutant *ase1Δ* and *dam1Δ* have ~50% survival rate (Fig. S3B). Interestingly, while *klp5Δ:ase1Δ* has 86% survival rate, an improvement over *ase1Δ* alone, *dam1Δ:ase1Δ* has 37% survival rate, a significant decrease from *dam1Δ* alone (Fig. S3B). We thus conclude that rescuing spindle length by removing antagonistic forces can, in some cases, rescue chromosome segregation defects.

**(A)** Artificial mini-chromosome loss assays for wildtype and mutant cells. The double-deletion *klp5Δ:ase1Δ* and *dam1Δ:ase1Δ* appeared to have less chromosome loss than their respective single-deletion. However, this assay does not account for cell death on plates.

**(B)** Plot comparing cell survival on plates for the artificial mini-chromosome loss assays from Fig. S3A. Normalized wildtype cell survival is 100%. Individual deletion *ase1Δ* and *dam1Δ* have ~50% survival rate, while *klp5Δ* has similar survival rate as wildtype. Interestingly, the double-

deletion  $klp5\Delta:ase1\Delta$  appeared to have better survival rate than  $ase1\Delta$ , but  $dam1\Delta:ase1\Delta$  has worse survival rate than either  $ase1\Delta$  or  $dam1\Delta$ .

**Figure S4.**

**(A)** Time-lapse images of  $dam1\Delta$  and  $dam1\Delta:ase1\Delta$  mitotic cells expressing mCherry-atb2p and CEN1-GFP at 23°C. Time 0 represents the transition from metaphase to anaphase A where sister kinetochores are observed to separate to opposite poles. No spindle shrinkage prior to the metaphase to anaphase transition was observed. Bar, 1  $\mu\text{m}$ .

**(B)** Comparative spindle length versus time plot of  $dam1\Delta$  (green) and  $dam1\Delta:ase1\Delta$  (red) cells. Pole-to-pole distance was measured 4 minute before and 4 minutes after cells exhibit kinetochore separation to opposite poles. No spindle shrinkage prior to the metaphase to anaphase transition was observed.

**(C)** Time-lapse images of  $dam1\Delta$  and  $dam1\Delta:cut7.24^{\text{ts}}$  mitotic cells expressing mCherry-atb2p and CEN1-GFP at 37°C. Time 0 represents the transition from metaphase to anaphase A where sister kinetochores are observed to separate to opposite poles. No spindle shrinkage prior to the metaphase to anaphase transition was observed. Bar, 1  $\mu\text{m}$ .

**(D)** Comparative spindle length versus time plot of  $dam1\Delta$  (green) and  $dam1\Delta:cut7.24^{\text{ts}}$  (red) cells. Pole-to-pole distance was measured 3.5 minute before and 3.5 minutes after cells exhibit kinetochore separation to opposite poles. No spindle shrinkage prior to the metaphase to anaphase transition was observed.

**Table S1. List of *S. pombe* strains used in this study.**

| Strain  | Genotype                                                                                       |
|---------|------------------------------------------------------------------------------------------------|
| PT.2133 | cdc13-GFP:NatR mCherry-atb2:HygR leu1-32 URA4-D18 h-                                           |
| CF.346  | klp2Δ:URA4 cdc13-GFP:KanR mCherry-atb2:HygR ade6-m210? leu1-32 ura4.D18 his3.D1 h-             |
| CF.348  | klp3Δ:KanR cdc13-GFP:NatR mCherry-atb2:HygR ade6-m210? leu1-32 ura4-D18 h?                     |
| CF.349  | tea2Δ:KanR cdc13-GFP:KanR mCherry-atb2:HygR ade6-m210? leu1-32 ura4-D18 h+                     |
| CF.350  | klp5Δ:URA4 cdc13-GFP:KanR mCherry-atb2:HygR ade6-m210? leu1-32 ura4-D18 his3.D1 h-             |
| CF.352  | klp6Δ:URA4 cdc13-GFP:KanR mCherry-atb2:HygR ade6-m210? leu1-32 ura4-D18 his3.D1 h+             |
| PT.3318 | klp8Δ:NatR cdc13-GFP:KanR mCherry-atb2:HygR ade6-m210? leu1-32 ura4-D18 h+                     |
| CF.354  | klp9Δ:KanR cdc13-GFP:KanR mCherry-atb2:HygR ade6-m210? leu1-32 ura4-D18 h?                     |
| CF.355  | dhc1Δ:KanR cdc13-GFP:KanR mCherry-atb2:HygR ade6-m210? leu1-32 ura4-D18 h?                     |
| CF.356  | ase1Δ:KanR cdc13-GFP:KanR mCherry-atb2:HygR ade6-m210? leu1-32? ura4-D18 h-                    |
| PT.2441 | dam1Δ:KanR cdc13-GFP:NatR mCherry-atb2:HygR ade6-m210? leu1-32 ura4-D18 h-                     |
| CF.391  | cut7.24 cdc13-GFP:NatR mCherry-atb2:HygR ade6-m210? leu1-32 ura4-D18 h+                        |
| CF.408  | klp6Δ:URA4 cut7.24 cdc13-GFP:NatR mCherry-atb2:HygR ade6-m210? leu1-32 ura4-D18 h-             |
| PT.2443 | dam1Δ:KanR cut7.24 cdc13-GFP:NatR mCherry-atb2:HygR ade6-m210? leu1-32 ura4-D18 h-             |
| PT.2210 | ase1Δ:KanR klp5Δ:URA4 cdc13-GFP:NatR mCherry-atb2:HygR ade6-m210? leu1-32 h+                   |
| PT.2509 | ase1Δ:KanR dam1Δ:KanR cdc13-GFP:NatR mCherry-atb2:HygR ade6-m210? leu1-32 ura4-D18 h-          |
| CF.441  | HIS7:LacI-GFP LYS1:LacO mCherry-atb2:HygR ade6-m210? leu1-32 ura4-D18 h+                       |
| PT.2887 | klp5Δ:URA4 HIS7:LacI-GFP LYS1:LacO mCherry-atb2:HygR ade6-m210? leu1-32 ura4-D18 h+            |
| CF.443  | klp6Δ:URA4 HIS7:LacI-GFP LYS1:LacO mCherry-atb2:HygR ade6-m210? leu1-32 ura4-D18 h+            |
| CF.445  | dam1Δ:KanR HIS7:LacI-GFP LYS1:LacO mCherry-atb2:HygR ade6-m210? leu1-32 ura4-D18 h+            |
| PT.2550 | ase1Δ:KanR klp5Δ:URA4 HIS7:LacI-GFP LYS1:LacO mCherry-atb2:HygR ade6-m210? leu1-32 h?          |
| PT.2698 | ase1Δ:KanR dam1Δ:NatR HIS7:LacI-GFP LYS1:LacO mCherry-atb2:HygR ade6-m210? leu1-32 ura4-D18 h? |
| CF.474  | klp6Δ:URA4 cut7.24 HIS7:LacI-GFP LYS1:LacO mCherry-atb2:HygR ade6-m210? leu1-32 ura4-D18 h+    |
| PT.2815 | dam1Δ:KanR cut7.24 HIS7:LacI-GFP LYS1:LacO mCherry-atb2:HygR ade6-m210? leu1-32 ura4-D18 h+    |
| CF.658  | miniChromosome Ch16:ADE6 ade6-210 his2 h+                                                      |
| PT.2626 | ase1Δ:KanR miniChromosome Ch16:ADE6 ade6-210 his2 h?                                           |
| PT.2639 | klp5Δ:NatR miniChromosome Ch16:ADE6 ade6-210 his2 h?                                           |
| PT.2637 | dam1Δ:NatR miniChromosome Ch16:ADE6 ade6-210 his2 h?                                           |
| PT.2552 | klp5Δ:URA4 ase1Δ:KanR miniChromosome Ch16:ADE6 ade6-210 his2 h?                                |
| PT.2638 | dam1Δ:NatR ase1Δ:KanR miniChromosome Ch16:ADE6 ade6-210 his2 h+                                |
| PT.3100 | mad2Δ:KanR cdc13-GFP:NatR mCherry-atb2:HygR ade6-m210? leu1-32 ura4-D18 h+                     |
| PT.3102 | klp5Δ:URA4 mad2Δ:KanR cdc13-GFP:NatR mCherry-atb2:HygR ade6-m210? leu1-32 ura4-D18 h+          |
| PT.3122 | dam1Δ:KanR mad2Δ:KanR cdc13-GFP:NatR mCherry-atb2:HygR ade6-m210? leu1-32 ura4-D18 h+          |
| PT.3219 | sid4-GFP:KanR mCherry-atb2:HygR leu1-32 ura4-D18 h-                                            |
| PT.3280 | pkl1Δ:NatR sid4-GFP:KanR mCherry-atb2:HygR ade6-m210? leu1-32 ura4-D18 h+                      |
| PT.1939 | mCherry-atb2:HygR leu1-32 URA4-D18 h-                                                          |
| PT.2973 | cut7-3xGFP mCherry-atb2:HygR ade6-m210? leu1-32 ura4-D18 h-                                    |
| CF.340  | cut7.24 mCherry-atb2:HygR ade6-m210? leu1-32 ura4-D18 h-                                       |
| PT.3315 | cut7.24-3xGFP mCherry-atb2:HygR ade6-m210? leu1-32 ura4-D18 h+ (1)                             |
| PT.3316 | cut7.24-3xGFP mCherry-atb2:HygR ade6-m210? leu1-32 ura4-D18 h+ (2)                             |
| CF.124  | mis12-GFP:LEU2 mCherry-atb2:HygR leu1-32 h-                                                    |
| PT.2441 | dam1Δ:NatR Mis12-GFP:LEU2 mCherry-atb2:HygR leu1-32 h+                                         |
| PT.3407 | klp5Δ:URA4 Mis12-GFP:LEU2 mCherry-atb2:HygR leu1-32 h+                                         |
| PT.3328 | dam1-A8-GFP:NatR klp5Δ:URA4 Mis12-GFP:LEU2 mCherry-atb2:HygR leu1-32 h+                        |



## **Experimental Procedures**

### **Strains and media**

Standard fission yeast media and techniques were used as described [S8]. Deletions were constructed by an established homologous recombination technique [S9]. Strains used in this study are listed in Table S1.

### **Microscopy**

Yeast cells were imaged with a Yokogawa spinning-disc confocal microscope equipped with Nikon PlanApo 100X/1.45 NA objective lens and a Hamamatsu cooled back-thinned CCD-camera or EM-CCD camera as previously described [S10]. Images were acquired and processed with MetaMorph 7.7 ([www.MolecularDevices.com](http://www.MolecularDevices.com)). For experiments involving cut7.24<sup>ts</sup> temperature shift, cells were first imaged at room temperature of 23°C then shifted to the non-permissive temperature of 35°C by either the fast microfluidic temperature device [S11], or 37°C by a home-built fast temperature box. To precisely identify the transition from metaphase to anaphase, *cdc13p*-GFP signal disappearance from the spindle was used [S12]. Additional details of imaging conditions are provided for each figure in supplemental section.

### **Data Analysis**

Spindle lengths were measured by calculating pole-to-pole distances, whose x-y positions were automatically tracked by MTtrackJ plugin in ImageJ ([www.imagej.gov](http://www.imagej.gov)) for Fig. 1D-F and 2D-E. Data were plotted as box plots generated with Kaleidagraph 4.0 ([www.synergy.com](http://www.synergy.com)). Each box encloses 50% of the data with the median value displayed as a line. The top and bottom of each box mark the minimum and maximum values within the data set that fall within an acceptable range. Any value outside of this range, called an outlier, is displayed as an individual point. Statistical analyses of data were performed using the Student's t-test for comparison between means, or Chi-squared test for comparison between frequencies in Microsoft Excel 2010.

### **Imaging**

The precise live-cell imaging conditions are stated below for each figure.

Fig. 1A, S1A, 3A, 4A, S4A: 3D timelapse stacks consisting of 11 optical sections of 0.5  $\mu\text{m}$  spacing were collected every 1 min with 600-ms exposure for GFP and 800-ms exposure for mCherry.

Fig. 1C, 2A, 2B, 2C: Images were acquired every 1 min with 1000-ms exposure for both GFP and mCherry. Cell chambers were switched from 23°C (blue) to 35°C (red) with a microfluidic temperature control device.

Fig. S2B: Images were acquired every 40 sec with 1000-ms exposure for both GFP and mCherry. Cell chambers were switched from 23°C (blue) to 37°C (red) with a temperature control device.

Fig. 4C, S4C: 3D timelapse stacks consisting of 11 optical sections of 0.5  $\mu\text{m}$  spacing were collected every 40 sec with 600-ms exposure for GFP and 800-ms exposure for mCherry.

### **Minichromosome loss assay**

The assay was performed as previously described [S4]. Briefly, cells (600 cells based on OD measurements) containing the artificial mini-chromosome were plated onto selection plates YE4S and incubated at 30°C for 3 days. Total colonies and pink colonies were counted to provide cell survival frequencies and percentage of chromosome loss.

### **Spot assay**

For all strains, initial cell concentrations were normalized to OD=0.5. For each strain, successive dilutions of 1,  $10^{-1}$ ,  $10^{-2}$ ,  $10^{-3}$ ,  $10^{-4}$ ,  $10^{-5}$  were spotted at 3  $\mu\text{L}$  onto YE5S plates. Plates were incubated for 3 days at 30°C (control, permissive temperature) or at 37°C (test, non-permissive temperature).

## References

- S1. Troxell, C.L., Sweezy, M.A., West, R.R., Reed, K.D., Carson, B.D., Pidoux, A.L., Cande, W.Z., and McIntosh, J.R. (2001). *pkl1(+)* and *klp2(+)*: Two kinesins of the Kar3 subfamily in fission yeast perform different functions in both mitosis and meiosis. *Molecular biology of the cell* 12, 3476-3488.
- S2. Hagan, I., and Yanagida, M. (1990). Novel potential mitotic motor protein encoded by the fission yeast *cut7+* gene. *Nature* 347, 563-566.
- S3. Hagan, I., and Yanagida, M. (1992). Kinesin-related *cut7* protein associates with mitotic and meiotic spindles in fission yeast. *Nature* 356, 74-76.
- S4. Niwa, O., Matsumoto, T., Chikashige, Y., and Yanagida, M. (1989). Characterization of *Schizosaccharomyces pombe* minichromosome deletion derivatives and a functional allocation of their centromere. *The EMBO journal* 8, 3045-3052.
- S5. Sanchez-Perez, I., Renwick, S.J., Crawley, K., Karig, I., Buck, V., Meadows, J.C., Franco-Sanchez, A., Fleig, U., Toda, T., and Millar, J.B. (2005). The DASH complex and Klp5/Klp6 kinesin coordinate bipolar chromosome attachment in fission yeast. *The EMBO journal* 24, 2931-2943.
- S6. West, R.R., Malmstrom, T., and McIntosh, J.R. (2002). Kinesins *klp5(+)* and *klp6(+)* are required for normal chromosome movement in mitosis. *Journal of cell science* 115, 931-940.
- S7. Yamashita, A., Sato, M., Fujita, A., Yamamoto, M., and Toda, T. (2005). The roles of fission yeast *ase1* in mitotic cell division, meiotic nuclear oscillation, and cytokinesis checkpoint signaling. *Molecular biology of the cell* 16, 1378-1395.
- S8. Moreno, S., Klar, A., and Nurse, P. (1991). Molecular genetic analysis of fission yeast *Schizosaccharomyces pombe*. *Methods in enzymology* 194, 795-823.
- S9. Bahler, J., Wu, J.Q., Longtine, M.S., Shah, N.G., McKenzie, A., 3rd, Steever, A.B., Wach, A., Philippsen, P., and Pringle, J.R. (1998). Heterologous modules for efficient and versatile PCR-based gene targeting in *Schizosaccharomyces pombe*. *Yeast* 14, 943-951.
- S10. Tran, P.T., Paoletti, A., and Chang, F. (2004). Imaging green fluorescent protein fusions in living fission yeast cells. *Methods* 33, 220-225.
- S11. Velve Casquillas, G., Fu, C., Le Berre, M., Cramer, J., Meance, S., Plecis, A., Baigl, D., Greffet, J.J., Chen, Y., Piel, M., et al. (2011). Fast microfluidic temperature control for high resolution live cell imaging. *Lab Chip* 11, 484-489.
- S12. Fu, C., Ward, J.J., Liodice, I., Velve-Casquillas, G., Nedelec, F.J., and Tran, P.T. (2009). Phospho-regulated interaction between kinesin-6 Klp9p and microtubule bundler Ase1p promotes spindle elongation. *Developmental cell* 17, 257-267.
